# Supplementary material
Source: MDPI journal article supplement (https://www.mdpi.com/2071-1050/11/23/6856)
Supplement: s1 [file s1]

## Supplementary Materials

Table S1. Investigation table.

| Items                                           | Year<br>2017 | Year 2016 | Remark                | Department of<br>Filling |
|-------------------------------------------------|--------------|-----------|-----------------------|--------------------------|
| Green products                                  |              |           | Certification<br>name |                          |
| Output value of green<br>products: Million Yuan |              |           |                       |                          |
| Output value: Million Yuan                      |              |           |                       |                          |
| Production: t                                   |              |           |                       |                          |
| Energy consumption                              |              |           |                       |                          |
| Raw coal                                        |              |           |                       |                          |
| crude oil                                       |              |           |                       |                          |
| natural gas                                     |              |           |                       |                          |
| Gasoline                                        |              |           |                       |                          |
| Diesel                                          |              |           |                       |                          |
| Electricity                                     |              |           |                       |                          |
| Renewable electricity                           |              |           |                       |                          |
| Other energy                                    |              |           |                       |                          |
| Water consumption                               |              |           |                       |                          |
| Water reuse                                     |              |           |                       |                          |
| List of green materials                         |              |           |                       |                          |
| Quantity of green materials                     |              |           |                       |                          |
| Raw materials                                   |              |           |                       |                          |
| Carbon emission: t                              |              |           |                       |                          |
| Land use:m <sup>2</sup>                         |              |           |                       |                          |
| SO <sub>2</sub> : t                             |              |           |                       |                          |
| COD: t                                          |              |           |                       |                          |
| Category of Solid waste                         |              |           |                       |                          |
| Value of solid waste                            |              |           |                       |                          |
| Treatment of solid waste                        |              |           |                       |                          |

**Table S2.** Quantitative indicators of H company in 2017.

| First Level Indicators  | Second Level Indicators                                                                                | Value of H Company in 2017          |
|-------------------------|--------------------------------------------------------------------------------------------------------|-------------------------------------|
| Green product           | Ratio of green product production value                                                                | 13%                                 |
|                         | Energy consumption per unit product                                                                    | 1.355 tons of standard coal/ton     |
|                         | Water consumption per unit product                                                                     | 116.3 tons/ton                      |
| Green design            | Environment impacts based on LCA                                                                       | -                                   |
|                         | Ratio of green materials                                                                               | 50%                                 |
|                         | Ratio of green investments                                                                             | 19.7%                               |
|                         | Recoverability rate of products                                                                        | 0                                   |
| Green manufacturing     | Removable rate of products                                                                             | -                                   |
|                         | Ratio of green equipment                                                                               | 12.4%                               |
|                         | Green transformation rate of process                                                                   | 80%                                 |
| Environment performance | Energy savings per unit of product                                                                     | 0.157 t standard coal/ t product,   |
|                         | Carbon emission reduction per unit of product                                                          | 0.013t/t product                    |
|                         | Electricity savings per unit of product                                                                | 0.013 kWh/t product                 |
|                         | Reduction in major pollutants of unit product (including COD, SO <sub>2</sub> , N <sub>x</sub> O etc.) | 0.0012 t COD /t product             |
| Resource efficiency     | Output value per energy consumption                                                                    | 0.306 million Yuan /t standard coal |
|                         | Water reuse rate                                                                                       | 35%                                 |
|                         | Ratio of renewable energy usage                                                                        | 5%                                  |
|                         | Material consumption per unit product                                                                  | 2.2 tons/ton                        |
|                         | Output value per unit land use                                                                         | 14,000 yuan/square meter            |
|                         | Comprehensive utilization rate of industrial solid waste                                               | 90%                                 |
